# Supplementary material for: Outcomes of a Randomized Study of a Peer-Taught Family-to-Family Education Program for Mental Illness
Source: Atypon-hosted journal article supplement (doi:10.1176/ps.62.6.pss6206_0591), 2011-06-01
Supplement: Dixon_ds.pdf [file Dixon_ds.pdf]

 


Psychiatry Online
